# Supplementary material
Source: publisher figshare collection journal article supplement (https://diabetesjournals.figshare.com/articles/dataset/_/20234823)
Supplement: Supplementary file 3 [file 2]

**Supplementary Table 1: Primer sequences used in quantitative PCR experiment**

|                                 |                                   |
|---------------------------------|-----------------------------------|
| <i>12/15-Lox</i>                | CAG-GGA-TCG-GAG-TAC-AGG-TT        |
|                                 | GAT-TGT-GCC-ATC-CTT-CCA-GT        |
| <i>5-Lox</i>                    | CTA-CGA-TGT-CAC-CGT-GGA-TG        |
|                                 | GTC-CTG-CTT-GAG-GAT-GTG-AA        |
| <i>Arginase1</i>                | GTG-AAG-AAC-CCA-CGG-TCT-GT        |
|                                 | CTG-GTT-GTC-AGG-GGA-GTG-TT        |
| <i>Blt2r</i>                    | GCG-TCA-ACC-CAG-TGC-TCT-AT        |
|                                 | TGC-CCC-ATT-ACT-TTC-AGC-TT        |
| <i>Ccr2</i>                     | AGA-GAG-CTG-CAG-CAA-AAA-GG        |
|                                 | GGA-AAG-AGG-CAG-TTG-CAA-AG        |
| <i>Cd11b</i>                    | GAC-TCA-GTC-AGC-CCC-ATC-AT        |
|                                 | AGA-TCG-TCT-TGG-GAG-ATG-CT        |
| <i>Cd36</i>                     | GCA-GAA-TCA-AGG-GAG-AGC-AC        |
|                                 | GAG-CAA-CTG-GTG-GAT-GGT-TT        |
| <i>Cd64</i>                     | GTT-ATT-GCC-ACC-AAG-GCT-GT        |
|                                 | ACC-TGT-ATT-CGT-CAC-TGT-CC        |
| <i>Cox2</i>                     | AGA-AGG-AAA-TGG-CTG-CAG-AA        |
|                                 | GCT-CGG-CTT-CCA-GTA-TTG-AG        |
| <i>Gapdh</i>                    | AAC-TTT-GGC-ATT-GTG-GAA-GG        |
|                                 | ACA-CAT-TGG-GGG-TAG-GAA-CA        |
| <i>Il-12p40</i>                 | ACT-CAC-ATC-TGC-TGC-TCC-AC        |
|                                 | ACG-CCA-TTC-CAC-ATG-TCA-CT        |
| <i>Il-10</i>                    | CCA-AGC-CTT-ATC-GGA-AAT-GA        |
|                                 | TTT-TCA-CAG-GGG-AGA-AAT-CG        |
| <i>Il1-ra</i>                   | GGC-CTA-GGT-GTC-TTC-TGC-TC        |
|                                 | GTA-AGG-GAG-TCA-CTT-GGG-GC        |
| <i>Il-1<math>\beta</math>-m</i> | CAA-CCA-ACA-AGT-GAT-ATT-CTC-GAT-G |
|                                 | GAT-CCA-CAC-TCT-CCA-GCT-GCA       |
| <i>inos</i>                     | TCC-TGG-ACA-TTA-CGA-CCC-CT        |
|                                 | ACA-AGG-CCT-CCA-ATC-TCT-GC        |
| <i>Lta4h</i>                    | GTT-GAC-AGC-TGA-ACC-CCA-GT        |
|                                 | CGT-GCC-CTT-AGT-TCC-ACA-TT        |
| <i>Ccl2</i>                     | AGG-TCC-CTG-TCA-TGC-TTC-TG        |
|                                 | TCT-GGA-CCC-ATT-CCT-TCT-TG        |
| <i>Mrc1</i>                     | GGG-TTC-ACC-TGG-AGT-GAT-GG        |
|                                 | ATG-CCA-GGG-TCA-CCT-TTC-AG        |
| <i>Tgf-<math>\beta</math></i>   | AGG-TTG-GCA-TTC-CAC-TTC-AC        |
|                                 | AGG-GGC-CTC-TAA-GAG-CAG-TC        |
| <i>Tnf-<math>\alpha</math></i>  | AGC-CCC-CAG-TCT-GTA-TCC-TT        |
|                                 | CTC-CCT-TTG-CAG-AAC-TCA-GG        |

|                   |                            |
|-------------------|----------------------------|
| <i><b>Ym1</b></i> | ACT-TTG-ATG-GCC-TCA-ACC-TG |
|                   | AAT-GAT-TCC-TGC-TCC-TGT-GG |
